# Supplementary material
Source: PubMed Central journal article supplement (PMC4822332)

**A**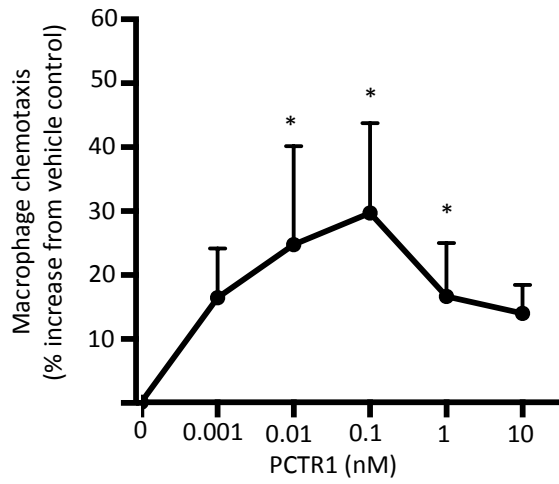**B**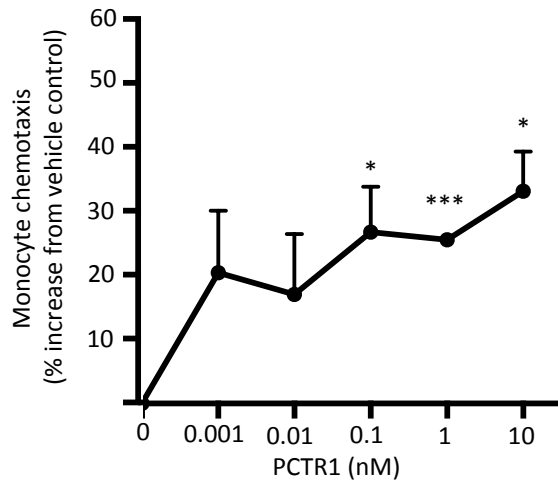**C**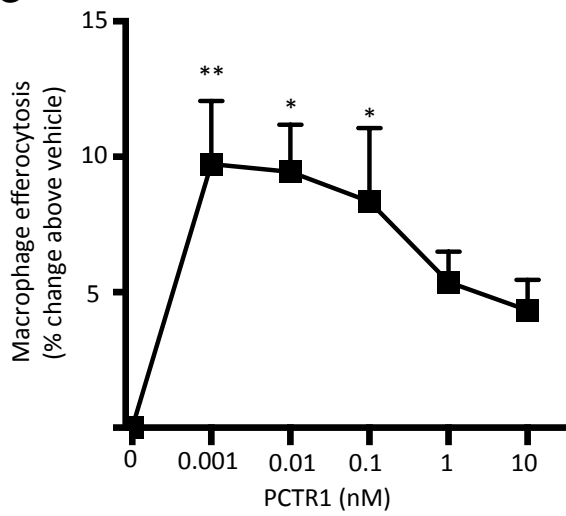

Supplement: mmc2.pdf [file mmc2.pdf]
